# Supplementary material
Source: PubMed Central journal article supplement (PMC8908227)
Supplement: jamapsychiatry-e220020-s002.pdf [file jamapsychiatry-e220020-s002.pdf]

## Supplemental Online Content: Nonauthor Collaborators

\*Indicates required information. Only first name, last name, and suffix will appear in PubMed.

| <b>Group Name:* ADNI</b>          |            |         |                  |             |                                          |                                                         |                                  |
|-----------------------------------|------------|---------|------------------|-------------|------------------------------------------|---------------------------------------------------------|----------------------------------|
| First Name and Middle Initial(s)* | Last Name* | Suffix* | Academic Degrees | Institution | Location (city, state/province, country) | Role or Contribution, eg, chair, principal investigator | Subgroup, eg, Steering Committee |
| Michael                           | Weiner     |         | MD               |             |                                          |                                                         |                                  |
| Paul                              | Aisen      |         | MD               |             |                                          |                                                         |                                  |
| Ronald                            | Petersen   |         | MD, PhD          |             |                                          |                                                         |                                  |
| Clifford R.                       | Jack       |         | Jr., MD          |             |                                          |                                                         |                                  |
| William                           | Jagust     |         | MD               |             |                                          |                                                         |                                  |
| John Q.                           | Trojanowki |         | MD, PhD          |             |                                          |                                                         |                                  |
| Arthur W.                         | Toga       |         | PhD              |             |                                          |                                                         |                                  |
| Laurel                            | Beckett    |         | PhD              |             |                                          |                                                         |                                  |
| Robert C.                         | Green      |         | MD, MPH          |             |                                          |                                                         |                                  |
| Andrew J.                         | Saykin     |         | PsyD             |             |                                          |                                                         |                                  |
| John                              | Morris     |         | MD               |             |                                          |                                                         |                                  |
| Leslie M.                         | Shaw       |         |                  |             |                                          |                                                         |                                  |
| Enchi                             | Liu        |         | PhD              |             |                                          |                                                         |                                  |
| Tom                               | Montine    |         | MD, PhD          |             |                                          |                                                         |                                  |
| Ronald G.                         | Thomas     |         | PhD              |             |                                          |                                                         |                                  |
| Michael                           | Donohue    |         | PhD              |             |                                          |                                                         |                                  |
| Sarah                             | Walter     |         | MSc              |             |                                          |                                                         |                                  |
| Devon                             | Gessert    |         |                  |             |                                          |                                                         |                                  |
| Tamie                             | Sather     |         | MS               |             |                                          |                                                         |                                  |
| Gus                               | Jiminez    |         | MBS              |             |                                          |                                                         |                                  |
| Danielle                          | Harvey     |         | PhD              |             |                                          |                                                         |                                  |
| Michael                           | Donohue    |         | PhD              |             |                                          |                                                         |                                  |
| Matthew                           | Bernstein  |         | PhD              |             |                                          |                                                         |                                  |
| Nick                              | Fox        |         | MD               |             |                                          |                                                         |                                  |
| Paul                              | Thompson   |         | PhD              |             |                                          |                                                         |                                  |
| Norbert                           | Schuff     |         | PhD              |             |                                          |                                                         |                                  |
| Charles                           | DeCarli    |         | MD               |             |                                          |                                                         |                                  |
| Bret                              | Borowski   |         | RT               |             |                                          |                                                         |                                  |
| Jeff                              | Gunter     |         | PhD              |             |                                          |                                                         |                                  |
| Matt                              | Senjem     |         | MS               |             |                                          |                                                         |                                  |
| Prashanthi                        | Vemuri     |         | PhD              |             |                                          |                                                         |                                  |
| David                             | Jones      |         | MD               |             |                                          |                                                         |                                  |
| Kejal                             | Kantarci   |         |                  |             |                                          |                                                         |                                  |

## Supplemental Online Content: Nonauthor Collaborators

\*Indicates required information. Only first name, last name, and suffix will appear in PubMed.

| First Name and Middle Initial(s)* | Last Name*  | Suffix* | Academic Degrees | Institution | Location (city, state/province, country) | Role or Contribution, eg, chair, principal investigator | Subgroup, eg, Steering Committee |
|-----------------------------------|-------------|---------|------------------|-------------|------------------------------------------|---------------------------------------------------------|----------------------------------|
| Chad                              | Ward        |         |                  |             |                                          |                                                         |                                  |
| Robert A.                         | Koepe       |         | PhD              |             |                                          |                                                         |                                  |
| Norm                              | Foster      |         | MD               |             |                                          |                                                         |                                  |
| Eric M.                           | Reiman      |         | MD               |             |                                          |                                                         |                                  |
| Kewei                             | Chen        |         | PhD              |             |                                          |                                                         |                                  |
| Chet                              | Mathis      |         | MD               |             |                                          |                                                         |                                  |
| Susan                             | Landau      |         | PhD              |             |                                          |                                                         |                                  |
| Nigel J.                          | Cairns      |         | PhD, MRCPATH     |             |                                          |                                                         |                                  |
| Lisa Taylor                       | Reinwald    |         | BA, HTL          |             |                                          |                                                         |                                  |
| Virginia                          | Lee         |         | PhD, MBA         |             |                                          |                                                         |                                  |
| Magdalena                         | Korecka     |         | PhD              |             |                                          |                                                         |                                  |
| Michal                            | Figurski    |         | PhD              |             |                                          |                                                         |                                  |
| Karen                             | Crawford    |         |                  |             |                                          |                                                         |                                  |
| Scott                             | Neu         |         | PhD              |             |                                          |                                                         |                                  |
| Tatiana M.                        | Foroud      |         | PhD              |             |                                          |                                                         |                                  |
| Steven                            | Potkin      |         | MD UC            |             |                                          |                                                         |                                  |
| Li                                | Shen        |         | PhD              |             |                                          |                                                         |                                  |
| Faber                             | Kelley      |         | MS, CCRC         |             |                                          |                                                         |                                  |
| Sungeun                           | Kim         |         | PhD              |             |                                          |                                                         |                                  |
| Kwangsik                          | Nho         |         | PhD              |             |                                          |                                                         |                                  |
| Zaven                             | Kachaturian |         | PhD              |             |                                          |                                                         |                                  |
| Richard                           | Frank       |         | MD, PhD          |             |                                          |                                                         |                                  |
| Peter J.                          | Snyder      |         | PhD              |             |                                          |                                                         |                                  |
| Susan                             | Molchan     |         | PhD              |             |                                          |                                                         |                                  |
| Jeffrey                           | Kaye        |         | MD               |             |                                          |                                                         |                                  |
| Joseph                            | Quinn       |         | MD               |             |                                          |                                                         |                                  |
| Betty                             | Lind        |         | BS               |             |                                          |                                                         |                                  |
| Raina                             | Carter      |         | BA               |             |                                          |                                                         |                                  |
| Sara                              | Dolen       |         | BS               |             |                                          |                                                         |                                  |
| Lon S.                            | Schneider   |         | MD               |             |                                          |                                                         |                                  |
| Sonia                             | Pawluczyk   |         | MD               |             |                                          |                                                         |                                  |
| Mauricio                          | Beccera     |         | BS               |             |                                          |                                                         |                                  |
| Liberty                           | Teodoro     |         | RN               |             |                                          |                                                         |                                  |
| Bryan M.                          | Spann       |         | DO, PhD          |             |                                          |                                                         |                                  |

Supplemental Online Content: Nonauthor Collaborators

\*Indicates required information. Only first name, last name, and suffix will appear in PubMed.

| First Name and Middle Initial(s)* | Last Name*  | Suffix* | Academic Degrees | Institution | Location (city, state/province, country) | Role or Contribution, eg, chair, principal investigator | Subgroup, eg, Steering Committee |
|-----------------------------------|-------------|---------|------------------|-------------|------------------------------------------|---------------------------------------------------------|----------------------------------|
| James                             | Brewer      |         | MD, PhD          |             |                                          |                                                         |                                  |
| Helen                             | Vanderswag  |         | RN               |             |                                          |                                                         |                                  |
| Adam                              | Fleisher    |         | MD               |             |                                          |                                                         |                                  |
| Judith L.                         | Heidebrink  |         | MD, MS           |             |                                          |                                                         |                                  |
| Joanne L.                         | Lord        |         | LPN, BA, CCRC    |             |                                          |                                                         |                                  |
| Ronald                            | Petersen    |         | MD, PhD          |             |                                          |                                                         |                                  |
| Sara S.                           | Mason       |         | RN               |             |                                          |                                                         |                                  |
| Colleen S.                        | Albers      |         | RN               |             |                                          |                                                         |                                  |
| David                             | Knopman     |         | MD               |             |                                          |                                                         |                                  |
| Kris                              | Johnson     |         | RN               |             |                                          |                                                         |                                  |
| Rachelle S.                       | Doody       |         | MD, PhD          |             |                                          |                                                         |                                  |
| Javier Villanueva                 | Meyer       |         | MD               |             |                                          |                                                         |                                  |
| Munir                             | Chowdhury   |         | MBBS, MS         |             |                                          |                                                         |                                  |
| Susan                             | Rountree    |         | MD               |             |                                          |                                                         |                                  |
| Mimi                              | Dang        |         | MD               |             |                                          |                                                         |                                  |
| Yaakov                            | Stern       |         | PhD              |             |                                          |                                                         |                                  |
| Lawrence S.                       | Honig       |         | MD, PhD          |             |                                          |                                                         |                                  |
| Karen L.                          | Bell        |         | MD               |             |                                          |                                                         |                                  |
| Beau                              | Ances       |         | MD               |             |                                          |                                                         |                                  |
| John C.                           | Morris      |         | MD               |             |                                          |                                                         |                                  |
| Maria                             | Carroll     |         | RN, MSN          |             |                                          |                                                         |                                  |
| Sue                               | Leon        |         | RN, MSN          |             |                                          |                                                         |                                  |
| Erin                              | Householder |         | MS, CCRP         |             |                                          |                                                         |                                  |
| Mark A.                           | Mintun      |         | MD               |             |                                          |                                                         |                                  |
| Stacy                             | Schneider   |         | APRN, BC, GNP    |             |                                          |                                                         |                                  |
| Angela                            | Oliver      |         | RN, BSN, MSG     |             |                                          |                                                         |                                  |
| Daniel                            | Marson      |         | JD, PhD          |             |                                          |                                                         |                                  |
| Randall                           | Griffith    |         | PhD, ABPP        |             |                                          |                                                         |                                  |
| David                             | Clark       |         | MD               |             |                                          |                                                         |                                  |
| David                             | Geldmacher  |         | MD               |             |                                          |                                                         |                                  |
| John                              | Brockington |         | MD               |             |                                          |                                                         |                                  |
| Erik                              | Roberson    |         | MD               |             |                                          |                                                         |                                  |
| Hillel                            | Grossman    |         | MD               |             |                                          |                                                         |                                  |
| Effie                             | Mitsis      |         | PhD              |             |                                          |                                                         |                                  |

## Supplemental Online Content: Nonauthor Collaborators

\*Indicates required information. Only first name, last name, and suffix will appear in PubMed.

| First Name and Middle Initial(s)* | Last Name*       | Suffix* | Academic Degrees | Institution | Location (city, state/province, country) | Role or Contribution, eg, chair, principal investigator | Subgroup, eg, Steering Committee |
|-----------------------------------|------------------|---------|------------------|-------------|------------------------------------------|---------------------------------------------------------|----------------------------------|
| Leyla                             | deToledo-Morrell |         | PhD              |             |                                          |                                                         |                                  |
| Raj C.                            | Shah             |         | MD               |             |                                          |                                                         |                                  |
| Ranjan                            | Duara            |         | MD               |             |                                          |                                                         |                                  |
| Daniel                            | Varon            |         | MD               |             |                                          |                                                         |                                  |
| Maria T.                          | Greig            |         | HP               |             |                                          |                                                         |                                  |
| Peggy                             | Roberts          |         | CNA              |             |                                          |                                                         |                                  |
| Marilyn                           | Albert           |         | PhD              |             |                                          |                                                         |                                  |
| Chiadi                            | Onyike           |         | MD               |             |                                          |                                                         |                                  |
| Daniel                            | D'Agostino II    |         | BS               |             |                                          |                                                         |                                  |
| Stephanie                         | Kielb            |         | BS               |             |                                          |                                                         |                                  |
| James E.                          | Galvin           |         | MD, MPH          |             |                                          |                                                         |                                  |
| Dana M.                           | Pogorelec        |         |                  |             |                                          |                                                         |                                  |
| Brittany                          | Cerbone          |         |                  |             |                                          |                                                         |                                  |
| Christina A.                      | Michel           |         |                  |             |                                          |                                                         |                                  |
| Henry                             | Rusinek          |         | PhD              |             |                                          |                                                         |                                  |
| Mony J de                         | Leon             |         | EdD              |             |                                          |                                                         |                                  |
| Lidia                             | Glodzik          |         | MD, PhD          |             |                                          |                                                         |                                  |
| Susan De                          | Santi            |         | PhD              |             |                                          |                                                         |                                  |
| P. Murali                         | Doraiswamy       |         | MD               |             |                                          |                                                         |                                  |
| Jeffrey R.                        | Petrella         |         | MD               |             |                                          |                                                         |                                  |
| Terence Z.                        | Wong             |         | MD               |             |                                          |                                                         |                                  |
| Steven E.                         | Arnold           |         | MD               |             |                                          |                                                         |                                  |
| Jason H.                          | Karlawish        |         | MD               |             |                                          |                                                         |                                  |
| David                             | Wolk             |         | MD               |             |                                          |                                                         |                                  |
| Charles D.                        | Smith            |         | MD               |             |                                          |                                                         |                                  |
| Greg                              | Jicha            |         | MD               |             |                                          |                                                         |                                  |
| Peter                             | Hardy            |         | PhD              |             |                                          |                                                         |                                  |
| Partha                            | Sinha            |         | PhD              |             |                                          |                                                         |                                  |
| Elizabeth                         | Oates            |         | MD               |             |                                          |                                                         |                                  |
| Gary                              | Conrad           |         | MD               |             |                                          |                                                         |                                  |
| Oscar L.                          | Lopez            |         | MD               |             |                                          |                                                         |                                  |
| MaryAnn                           | Oakley           |         | MA               |             |                                          |                                                         |                                  |
| Donna M.                          | Simpson          |         | CRNP, MPH        |             |                                          |                                                         |                                  |
| Anton P.                          | Porsteinsson     |         | MD               |             |                                          |                                                         |                                  |

## Supplemental Online Content: Nonauthor Collaborators

\*Indicates required information. Only first name, last name, and suffix will appear in PubMed.

| First Name and Middle Initial(s)* | Last Name* | Suffix* | Academic Degrees | Institution | Location (city, state/province, country) | Role or Contribution, eg, chair, principal investigator | Subgroup, eg, Steering Committee |
|-----------------------------------|------------|---------|------------------|-------------|------------------------------------------|---------------------------------------------------------|----------------------------------|
| Bonnie S.                         | Goldstein  |         | MS, NP           |             |                                          |                                                         |                                  |
| Kim                               | Martin     |         | RN               |             |                                          |                                                         |                                  |
| Kelly M.                          | Makino     |         | BS               |             |                                          |                                                         |                                  |
| M. Saleem                         | Ismail     |         | MD               |             |                                          |                                                         |                                  |
| Connie                            | Brand      |         | RN               |             |                                          |                                                         |                                  |
| Ruth A.                           | Mulnard    |         | DNSc, RN, FAAN   |             |                                          |                                                         |                                  |
| Gaby                              | Thai       |         | MD               |             |                                          |                                                         |                                  |
| Catherine Mc Adam                 | Ortiz      |         | MSN, RN, A/GNP   |             |                                          |                                                         |                                  |
| Kyle                              | Womack     |         | MD               |             |                                          |                                                         |                                  |
| Dana                              | Mathews    |         | MD, PhD          |             |                                          |                                                         |                                  |
| Mary                              | Quiceno    |         | MD               |             |                                          |                                                         |                                  |
| Ramon Diaz                        | Arrastia   |         | MD, PhD          |             |                                          |                                                         |                                  |
| Richard                           | King       |         | MD               |             |                                          |                                                         |                                  |
| Myron                             | Weiner     |         | MD               |             |                                          |                                                         |                                  |
| Kristen Martin                    | Cook       |         | MA               |             |                                          |                                                         |                                  |
| Michael                           | DeVous     |         | PhD              |             |                                          |                                                         |                                  |
| Allan I.                          | Levey      |         | MD, PhD          |             |                                          |                                                         |                                  |
| James J.                          | Lah        |         | MD, PhD          |             |                                          |                                                         |                                  |
| Janet S.                          | Cellar     |         | DNP, PMHCNS BC   |             |                                          |                                                         |                                  |
| Jeffrey M.                        | Burns      |         | MD               |             |                                          |                                                         |                                  |
| Heather S.                        | Anderson   |         | MD               |             |                                          |                                                         |                                  |
| Russell H.                        | Swerdlow   |         | MD               |             |                                          |                                                         |                                  |
| Liana                             | Apostolova |         | MD               |             |                                          |                                                         |                                  |
| Kathleen                          | Tingus     |         | PhD              |             |                                          |                                                         |                                  |
| Ellen                             | Woo        |         | PhD              |             |                                          |                                                         |                                  |
| Daniel H.S.                       | Silverman  |         | MD, PhD          |             |                                          |                                                         |                                  |
| Po H.                             | Lu         |         | PsyD             |             |                                          |                                                         |                                  |
| George                            | Bartzokis  |         | MD               |             |                                          |                                                         |                                  |
| Neill R Graff                     | Radford    |         | MBBCH, FRCP      |             |                                          |                                                         |                                  |
| Francine                          | Parfitt    |         | MSH, CCRC        |             |                                          |                                                         |                                  |
| Tracy                             | Kendall    |         | BA, CCRP         |             |                                          |                                                         |                                  |
| Heather                           | Johnson    |         | MLS, CCRP        |             |                                          |                                                         |                                  |
| Martin R.                         | Farlow     |         | MD               |             |                                          |                                                         |                                  |
| Ann Marie                         | Hake       |         | MD               |             |                                          |                                                         |                                  |

## Supplemental Online Content: Nonauthor Collaborators

\*Indicates required information. Only first name, last name, and suffix will appear in PubMed.

| First Name and Middle Initial(s)* | Last Name* | Suffix* | Academic Degrees | Institution | Location (city, state/province, country) | Role or Contribution, eg, chair, principal investigator | Subgroup, eg, Steering Committee |
|-----------------------------------|------------|---------|------------------|-------------|------------------------------------------|---------------------------------------------------------|----------------------------------|
| Brandy R.                         | Matthews   |         | MD               |             |                                          |                                                         |                                  |
| Scott                             | Herring    |         | RN, CCRC         |             |                                          |                                                         |                                  |
| Cynthia                           | Hunt       |         | BS, CCRP         |             |                                          |                                                         |                                  |
| Christopher H. van                | Dyck       |         | MD               |             |                                          |                                                         |                                  |
| Richard E.                        | Carson     |         | PhD              |             |                                          |                                                         |                                  |
| Martha G.                         | MacAvoy    |         | PhD              |             |                                          |                                                         |                                  |
| Howard                            | Chertkow   |         | MD               |             |                                          |                                                         |                                  |
| Howard                            | Bergman    |         | MD               |             |                                          |                                                         |                                  |
| Chris                             | Hosein     |         | Med              |             |                                          |                                                         |                                  |
| Sandra                            | Black      |         | MD, FRCPC        |             |                                          |                                                         |                                  |
| Bojana                            | Stefanovic |         | PhD              |             |                                          |                                                         |                                  |
| Curtis                            | Caldwell   |         | PhD              |             |                                          |                                                         |                                  |
| Ging Yuek Robin                   | Hsiung     |         | MD, MHSc, FRCPC  |             |                                          |                                                         |                                  |
| Howard                            | Feldman    |         | MD, FRCPC        |             |                                          |                                                         |                                  |
| Benita                            | Mudge      |         | BS               |             |                                          |                                                         |                                  |
| Michele                           | Assaly     |         | MA Past          |             |                                          |                                                         |                                  |
| Andrew                            | Kertesz    |         | MD               |             |                                          |                                                         |                                  |
| John                              | Rogers     |         | MD               |             |                                          |                                                         |                                  |
| Dick                              | Trost      |         | PhD              |             |                                          |                                                         |                                  |
| Charles                           | Bernick    |         | MD               |             |                                          |                                                         |                                  |
| Donna                             | Munic      |         | PhD              |             |                                          |                                                         |                                  |
| Diana                             | Kerwin     |         | MD               |             |                                          |                                                         |                                  |
| Marek Marsel                      | Mesulam    |         | MD               |             |                                          |                                                         |                                  |
| Kristine                          | Lipowski   |         | BA               |             |                                          |                                                         |                                  |
| Chuang Kuo                        | Wu         |         | MD, PhD          |             |                                          |                                                         |                                  |
| Nancy                             | Johnson    |         | PhD              |             |                                          |                                                         |                                  |
| Carl                              | Sadowsky   |         | MD               |             |                                          |                                                         |                                  |
| Walter                            | Martinez   |         | MD               |             |                                          |                                                         |                                  |
| Teresa                            | Villena    |         | MD               |             |                                          |                                                         |                                  |
| Raymond Scott                     | Turner     |         | MD, PhD          |             |                                          |                                                         |                                  |
| Kathleen                          | Johnson    |         | NP               |             |                                          |                                                         |                                  |
| Brigid                            | Reynolds   |         | NP               |             |                                          |                                                         |                                  |
| Reisa A.                          | Sperling   |         | MD               |             |                                          |                                                         |                                  |
| Keith A.                          | Johnson    |         | MD               |             |                                          |                                                         |                                  |

## Supplemental Online Content: Nonauthor Collaborators

\*Indicates required information. Only first name, last name, and suffix will appear in PubMed.

| First Name and Middle Initial(s)* | Last Name*  | Suffix* | Academic Degrees | Institution | Location (city, state/province, country) | Role or Contribution, eg, chair, principal investigator | Subgroup, eg, Steering Committee |
|-----------------------------------|-------------|---------|------------------|-------------|------------------------------------------|---------------------------------------------------------|----------------------------------|
| Gad                               | Marshall    |         | MD               |             |                                          |                                                         |                                  |
| Meghan                            | Frey        |         |                  |             |                                          |                                                         |                                  |
| Jerome                            | Yesavage    |         | MD               |             |                                          |                                                         |                                  |
| Joy L.                            | Taylor      |         | PhD              |             |                                          |                                                         |                                  |
| Barton                            | Lane        |         | MD               |             |                                          |                                                         |                                  |
| Allyson                           | Rosen       |         | PhD              |             |                                          |                                                         |                                  |
| Jared                             | Tinklenberg |         | MD               |             |                                          |                                                         |                                  |
| Marwan N.                         | Sabbagh     |         | MD               |             |                                          |                                                         |                                  |
| Christine M.                      | Belden      |         | PsyD             |             |                                          |                                                         |                                  |
| Sandra A.                         | Jacobson    |         | MD               |             |                                          |                                                         |                                  |
| Sherye A.                         | Sirrel      |         | MS               |             |                                          |                                                         |                                  |
| Neil                              | Kowall      |         | MD               |             |                                          |                                                         |                                  |
| Ronald                            | Killiany    |         | PhD              |             |                                          |                                                         |                                  |
| Andrew E.                         | Budson      |         | MD               |             |                                          |                                                         |                                  |
| Alexander                         | Norbash     |         | MD               |             |                                          |                                                         |                                  |
| Patricia Lynn                     | Johnson     |         | BA               |             |                                          |                                                         |                                  |
| Thomas O.                         | Obisesan    |         | MD, MPH          |             |                                          |                                                         |                                  |
| Saba                              | Wolday      |         | MSc              |             |                                          |                                                         |                                  |
| Joanne                            | Allard      |         | PhD              |             |                                          |                                                         |                                  |
| Alan                              | Lerner      |         | MD               |             |                                          |                                                         |                                  |
| Paula                             | Ogrocki     |         | PhD              |             |                                          |                                                         |                                  |
| Leon                              | Hudson      |         | MPH              |             |                                          |                                                         |                                  |
| Evan                              | Fletcher    |         | PhD              |             |                                          |                                                         |                                  |
| Owen                              | Carmichael  |         | PhD              |             |                                          |                                                         |                                  |
| John                              | Olichney    |         | MD               |             |                                          |                                                         |                                  |
| Charles                           | DeCarli     |         | MD               |             |                                          |                                                         |                                  |
| Smita                             | Kittur      |         | MD               |             |                                          |                                                         |                                  |
| Michael                           | Borrie      |         | MB ChB           |             |                                          |                                                         |                                  |
| T Y                               | Lee         |         | PhD              |             |                                          |                                                         |                                  |
| Dr Rob                            | Bartha      |         | PhD              |             |                                          |                                                         |                                  |
| Sterling                          | Johnson     |         | PhD              |             |                                          |                                                         |                                  |
| Sanjay                            | Asthana     |         | MD               |             |                                          |                                                         |                                  |
| Cynthia M.                        | Carlsson    |         | MD               |             |                                          |                                                         |                                  |
| Steven G.                         | Potkin      |         | MD               |             |                                          |                                                         |                                  |

## Supplemental Online Content: Nonauthor Collaborators

\*Indicates required information. Only first name, last name, and suffix will appear in PubMed.

| First Name and Middle Initial(s)* | Last Name* | Suffix* | Academic Degrees | Institution | Location (city, state/province, country) | Role or Contribution, eg, chair, principal investigator | Subgroup, eg, Steering Committee |
|-----------------------------------|------------|---------|------------------|-------------|------------------------------------------|---------------------------------------------------------|----------------------------------|
| Adrian                            | Preda      |         | MD               |             |                                          |                                                         |                                  |
| Dana                              | Nguyen     |         | PhD              |             |                                          |                                                         |                                  |
| Pierre                            | Tariot     |         | MD               |             |                                          |                                                         |                                  |
| Adam                              | Fleisher   |         | MD               |             |                                          |                                                         |                                  |
| Stephanie                         | Reeder     |         | BA               |             |                                          |                                                         |                                  |
| Vernice                           | Bates      |         | MD               |             |                                          |                                                         |                                  |
| Horacio                           | Capote     |         | MD               |             |                                          |                                                         |                                  |
| Michelle                          | Rainka     |         | PharmD, CCRP     |             |                                          |                                                         |                                  |
| Douglas W.                        | Scharre    |         | MD               |             |                                          |                                                         |                                  |
| Maria                             | Kataki     |         | MD, PhD          |             |                                          |                                                         |                                  |
| Anahita                           | Adeli      |         | MD               |             |                                          |                                                         |                                  |
| Earl A.                           | Zimmerman  |         | MD               |             |                                          |                                                         |                                  |
| Dzintra                           | Celmins    |         | MD               |             |                                          |                                                         |                                  |
| Alice D.                          | Brown      |         | FNP              |             |                                          |                                                         |                                  |
| Godfrey D.                        | Pearlson   |         | MD               |             |                                          |                                                         |                                  |
| Karen                             | Blank      |         | MD               |             |                                          |                                                         |                                  |
| Karen                             | Anderson   |         | RN               |             |                                          |                                                         |                                  |
| Robert B.                         | Santulli   |         | MD               |             |                                          |                                                         |                                  |
| Tamar J.                          | Kitzmiller |         |                  |             |                                          |                                                         |                                  |
| Eben S.                           | Schwartz   |         | PhD              |             |                                          |                                                         |                                  |
| Kaycee M.                         | Sink       |         | MD, MAS          |             |                                          |                                                         |                                  |
| Jeff D.                           | Williamson |         | MD, MHS          |             |                                          |                                                         |                                  |
| Pradeep                           | Garg       |         | PhD              |             |                                          |                                                         |                                  |
| Franklin                          | Watkins    |         | MD               |             |                                          |                                                         |                                  |
| Brian R.                          | Ott        |         | MD               |             |                                          |                                                         |                                  |
| Henry                             | Querfurth  |         | MD               |             |                                          |                                                         |                                  |
| Geoffrey                          | Tremont    |         | PhD              |             |                                          |                                                         |                                  |
| Stephen                           | Salloway   |         | MD, MS           |             |                                          |                                                         |                                  |
| Paul                              | Malloy     |         | PhD              |             |                                          |                                                         |                                  |
| Stephen                           | Correia    |         | PhD              |             |                                          |                                                         |                                  |
| Howard J.                         | Rosen      |         | MD               |             |                                          |                                                         |                                  |
| Bruce L.                          | Miller     |         | MD               |             |                                          |                                                         |                                  |
| Jacobo                            | Mintzer    |         | MD, MBA          |             |                                          |                                                         |                                  |
| Kenneth                           | Spicer     |         | MD, PhD          |             |                                          |                                                         |                                  |



## Supplemental Online Content: Nonauthor Collaborators

\*Indicates required information. Only first name, last name, and suffix will appear in PubMed.

| First Name and Middle Initial(s)* | Last Name* | Suffix* | Academic Degrees | Institution | Location (city, state/province, country) | Role or Contribution, eg, chair, principal investigator | Subgroup, eg, Steering Committee |
|-----------------------------------|------------|---------|------------------|-------------|------------------------------------------|---------------------------------------------------------|----------------------------------|
| David                             | Bachman    |         | MD               |             |                                          |                                                         |                                  |
| Elizabeth                         | Finger     |         | MD               |             |                                          |                                                         |                                  |
| Stephen                           | Pasternak  |         | MD               |             |                                          |                                                         |                                  |
| Irina                             | Rachinsky  |         | MD               |             |                                          |                                                         |                                  |
| John                              | Rogers     |         | MD               |             |                                          |                                                         |                                  |
| Andrew                            | Kertesz    |         | MD               |             |                                          |                                                         |                                  |
| Dick                              | Drost      |         | MD               |             |                                          |                                                         |                                  |
| Nunzio                            | Pomara     |         | MD               |             |                                          |                                                         |                                  |
| Raymundo                          | Hernando   |         | MD               |             |                                          |                                                         |                                  |
| Antero                            | Sarrael    |         | MD               |             |                                          |                                                         |                                  |
| Susan K.                          | Schultz    |         | MD               |             |                                          |                                                         |                                  |
| Laura L. Boles                    | Ponto      |         | PhD              |             |                                          |                                                         |                                  |
| Hyungsub                          | Shim       |         | MD               |             |                                          |                                                         |                                  |
| Karen Elizabeth                   | Smith      |         | RN               |             |                                          |                                                         |                                  |
| Norman                            | Relkin     |         | MD, PhD          |             |                                          |                                                         |                                  |
| Gloria                            | Chaing     |         | MD               |             |                                          |                                                         |                                  |
| Lisa                              | Raudin     |         | PhD              |             |                                          |                                                         |                                  |
| Amanda                            | Smith      |         | MD               |             |                                          |                                                         |                                  |
| Kristin                           | Fargher    |         | MD               |             |                                          |                                                         |                                  |
| Balebail Ashok                    | Raj        |         | MD               |             |                                          |                                                         |                                  |
