# Supplementary material
Source: PubMed Central journal article supplement (PMC8908227)
Supplement: jamapsychiatry-e220020-s003.pdf [file jamapsychiatry-e220020-s003.pdf]

## Supplemental Online Content: Nonauthor Collaborators

\*Indicates required information. Only first name, last name, and suffix will appear in PubMed.

| <b>Group Name:* BIOCARD</b>       |            |         |                  |                                                                                 |                                          |                                                         |                                  |
|-----------------------------------|------------|---------|------------------|---------------------------------------------------------------------------------|------------------------------------------|---------------------------------------------------------|----------------------------------|
| First Name and Middle Initial(s)* | Last Name* | Suffix* | Academic Degrees | Institution                                                                     | Location (city, state/province, country) | Role or Contribution, eg, chair, principal investigator | Subgroup, eg, Steering Committee |
| Michael                           | Miller     |         | PhD              | Johns Hopkins University                                                        | Baltimore, MD, USA                       | BIOCARD Imaging Core Leader                             |                                  |
| Susumu                            | Mori       |         | PhD              | Johns Hopkins University                                                        | Baltimore, MD, USA                       | BIOCARD Imaging Core Co-I                               |                                  |
| Hanzhang                          | Lu         |         | PhD              | Johns Hopkins University                                                        | Baltimore, MD, USA                       | BIOCARD Imaging Core Co-I                               |                                  |
| Peter                             | vanZijl    |         | PhD              | Johns Hopkins University                                                        | Baltimore, MD, USA                       | BIOCARD Imaging Core Co-I                               |                                  |
| Laurent                           | Younes     |         | PhD              | Johns Hopkins University                                                        | Baltimore, MD, USA                       | BIOCARD Imaging Core Co-I                               |                                  |
| Christos                          | Davatzikos |         | PhD              | Center for Biomedical Image Computing and Analytics, University of Pennsylvania | Philadelphia, PA, USA                    |                                                         |                                  |
| Anja                              | Soldan     |         | PhD              | Johns Hopkins University                                                        | Baltimore, MD, USA                       | BIOCARD Clinical Core Co-Leader                         |                                  |
| Corinne                           | Pettigrew  |         | PhD              | Johns Hopkins University                                                        | Baltimore, MD, USA                       | BIOCARD Clinical Core Co-I                              |                                  |
| Marilyn S.                        | Albert     |         | PhD              | Johns Hopkins University                                                        | Baltimore, MD, USA                       |                                                         |                                  |
| Ann                               | Ervin      |         | PhD              | Johns Hopkins University                                                        | Baltimore, MD, USA                       | Informatics Core Leader                                 |                                  |
