# Supplementary material
Source: PubMed Central journal article supplement (PMC8908227)
Supplement: jamapsychiatry-e220020-s005.pdf [file jamapsychiatry-e220020-s005.pdf]

## Supplemental Online Content: Nonauthor Collaborators

\*Indicates required information. Only first name, last name, and suffix will appear in PubMed.

| <b>Group Name: * ISTAGING</b>     |            |         |                  |                                                                                 |                                          |                                                         |                                  |
|-----------------------------------|------------|---------|------------------|---------------------------------------------------------------------------------|------------------------------------------|---------------------------------------------------------|----------------------------------|
| First Name and Middle Initial(s)* | Last Name* | Suffix* | Academic Degrees | Institution                                                                     | Location (city, state/province, country) | Role or Contribution, eg, chair, principal investigator | Subgroup, eg, Steering Committee |
| Ahmed                             | Abdulkadir |         | PhD              | Center for Biomedical Image Computing and Analytics, University of Pennsylvania | Philadelphia, PA, USA                    |                                                         |                                  |
| Vishnu                            | Bashyam    |         | MS               | Center for Biomedical Image Computing and Analytics, University of Pennsylvania | Philadelphia, PA, USA                    |                                                         |                                  |
| Christos                          | Davatzikos |         | PhD              | Center for Biomedical Image Computing and Analytics, University of Pennsylvania | Philadelphia, PA, USA                    |                                                         |                                  |
| Jimit                             | Doshi      |         | MS               | Center for Biomedical Image Computing and Analytics, University of Pennsylvania | Philadelphia, PA, USA                    |                                                         |                                  |
| Guray                             | Erus       |         | PhD              | Center for Biomedical Image Computing and Analytics, University of Pennsylvania | Philadelphia, PA, USA                    |                                                         |                                  |
| Yong                              | Fan        |         | PhD              | Center for Biomedical Image Computing and Analytics, University of Pennsylvania | Philadelphia, PA, USA                    |                                                         |                                  |
| Mohamad                           | Habes      |         | PhD              | Center for Biomedical Image Computing and Analytics, University of Pennsylvania | Philadelphia, PA, USA                    |                                                         |                                  |
| Elizabeth                         | Mamouiran  |         | MS               | Center for Biomedical Image Computing and Analytics, University of Pennsylvania | Philadelphia, PA, USA                    |                                                         |                                  |
| Randa                             | Melhem     |         | MS               | Center for Biomedical Image Computing and Analytics, University of Pennsylvania | Philadelphia, PA, USA                    |                                                         |                                  |
| Ilya M.                           | Narashall  |         | MD, PhD          | Department of Radiology, University of Pennsylvania                             | Philadelphia, PA, USA                    |                                                         |                                  |

## Supplemental Online Content: Nonauthor Collaborators

\*Indicates required information. Only first name, last name, and suffix will appear in PubMed.

| First Name and Middle Initial(s)* | Last Name*   | Suffix* | Academic Degrees | Institution                                                                           | Location (city, state/province, country) | Role or Contribution, eg, chair, principal investigator | Subgroup, eg, Steering Committee |
|-----------------------------------|--------------|---------|------------------|---------------------------------------------------------------------------------------|------------------------------------------|---------------------------------------------------------|----------------------------------|
| Raymond                           | Pomponio     |         | MS               | Center for Biomedical Image Computing and Analytics, University of Pennsylvania       | Philadelphia, PA, USA                    |                                                         |                                  |
| Dushyant                          | Sahoo        |         | MS               | Center for Biomedical Image Computing and Analytics, University of Pennsylvania       | Philadelphia, PA, USA                    |                                                         |                                  |
| Singh                             | Ashish       |         | MS               | Center for Biomedical Image Computing and Analytics, University of Pennsylvania       | Philadelphia, PA, USA                    |                                                         |                                  |
| Haochang                          | Shou         |         | PhD              | Department of Biostatistics, Epidemiology and Informatics, University of Pennsylvania | Philadelphia, PA, USA                    |                                                         |                                  |
| Ioanna                            | Skampardonis |         | MS               | Center for Biomedical Image Computing and Analytics, University of Pennsylvania       | Philadelphia, PA, USA                    |                                                         |                                  |
| Lasya                             | Sreepada     |         | Mrs              | Center for Biomedical Image Computing and Analytics, University of Pennsylvania       | Philadelphia, PA, USA                    |                                                         |                                  |
| Dhivya                            | Srinivasan   |         | MS               | Center for Biomedical Image Computing and Analytics, University of Pennsylvania       | Philadelphia, PA, USA                    |                                                         |                                  |
| Junhao                            | Wen          |         | PhD              | Center for Biomedical Image Computing and Analytics, University of Pennsylvania       | Philadelphia, PA, USA                    |                                                         |                                  |
| David A.                          | Wolk         |         | MD, PhD          | Department of Neurology and Penn Memory Center, University of Pennsylvania            | Philadelphia, PA, USA                    |                                                         |                                  |
| Zhijian                           | Yang         |         | Mr               | Center for Biomedical Image Computing and Analytics, University of Pennsylvania       | Philadelphia, PA, USA                    |                                                         |                                  |

## Supplemental Online Content: Nonauthor Collaborators

\*Indicates required information. Only first name, last name, and suffix will appear in PubMed.

| First Name and Middle Initial(s)* | Last Name*   | Suffix* | Academic Degrees | Institution                                                                     | Location (city, state/province, country) | Role or Contribution, eg, chair, principal investigator | Subgroup, eg, Steering Committee |
|-----------------------------------|--------------|---------|------------------|---------------------------------------------------------------------------------|------------------------------------------|---------------------------------------------------------|----------------------------------|
| Fanyang                           | Yu           |         | MS               | Center for Biomedical Image Computing and Analytics, University of Pennsylvania | Philadelphia, PA, USA                    |                                                         |                                  |
| Sindhuja Tirumalai                | Govindarajan |         | PhD              | Center for Biomedical Image Computing and Analytics, University of Pennsylvania | Philadelphia, PA, USA                    |                                                         |                                  |
| Yuhan                             | Cui          |         | MS               | Center for Biomedical Image Computing and Analytics, University of Pennsylvania | Philadelphia, PA, USA                    |                                                         |                                  |
| Zhen                              | Zhou         |         | PhD              | Center for Biomedical Image Computing and Analytics, University of Pennsylvania | Philadelphia, PA, USA                    |                                                         |                                  |
| Katharina                         | Wittfeld     |         | PhD              | German Center for Neurodegenerative Diseases (DZNE)                             | Site Rostock/Greifswald, Germany         |                                                         |                                  |
| Hans J.                           | Grabe        |         | PhD              | German Center for Neurodegenerative Diseases (DZNE)                             | Site Rostock/Greifswald, Germany         |                                                         |                                  |
| Duygun                            | Tosun        |         | PhD              | Department of Radiology and Biomedical Imaging, University of California        | San Francisco, San Francisco, CA, USA    |                                                         |                                  |
| Murat                             | Bilgel       |         | PhD              | Laboratory of Behavioral Neuroscience, National Institute on Aging              | Baltimore, MD, USA                       |                                                         |                                  |
| Yang                              | An           |         | PhD              | Laboratory of Behavioral Neuroscience, National Institute on Aging              | Baltimore, MD, USA                       |                                                         |                                  |
| Susan M.                          | Resnick      |         | PhD              | Laboratory of Behavioral Neuroscience, National Institute on Aging              | Baltimore, MD, USA                       |                                                         |                                  |

## Supplemental Online Content: Nonauthor Collaborators

\*Indicates required information. Only first name, last name, and suffix will appear in PubMed.

| First Name and Middle Initial(s)* | Last Name* | Suffix* | Academic Degrees | Institution                                                                                                                                 | Location (city, state/province, country) | Role or Contribution, eg, chair, principal investigator | Subgroup, eg, Steering Committee |
|-----------------------------------|------------|---------|------------------|---------------------------------------------------------------------------------------------------------------------------------------------|------------------------------------------|---------------------------------------------------------|----------------------------------|
| Luigi                             | Fernucci   |         | PhD              | Longitudinal Study Section, Translational Gerontology Branch, National Institute on Aging                                                   | Baltimore, MD, USA                       |                                                         |                                  |
| John C.                           | Morris     |         | MD               | Knight Alzheimer Disease Research Center, Washington University in St. Louis                                                                | St. Louis, MO, USA                       |                                                         |                                  |
| Daniel S.                         | Marcus     |         | PhD              | Department of Radiology, Washington University School of Medicine                                                                           | St. Louis, MO, USA                       |                                                         |                                  |
| Pamela                            | LaMontagne |         | PhD              | Department of Radiology, Washington University School of Medicine                                                                           | St. Louis, MO, USA                       |                                                         |                                  |
| Susan R.                          | Heckbert   |         | MD, PhD          | Department of Epidemiology, University of Washington                                                                                        | Seattle, WA, USA                         |                                                         |                                  |
| Thomas R.                         | Austin     |         | PhD              | Department of Epidemiology, University of Washington                                                                                        | Seattle, WA, USA                         |                                                         |                                  |
| Lenore J.                         | Launer     |         | PhD              | Intramural Research Program, Laboratory of Epidemiology and Population Sciences, National Institute on Aging, National Institutes of Health | Bethesda, MD, USA                        |                                                         |                                  |
| Aristeidis                        | Sotiras    |         | PhD              | Mallinckrodt Institute of Radiology, Institute for Informatics, Washington University in Saint Louis                                        | Saint Louis, MO, USA                     |                                                         |                                  |
| Mark                              | Espeland   |         | PhD              | Department of Internal Medicine, Wake Forest School of Medicine                                                                             | Winston-Salem, NC, USA                   |                                                         |                                  |

## Supplemental Online Content: Nonauthor Collaborators

\*Indicates required information. Only first name, last name, and suffix will appear in PubMed.

| First Name and Middle Initial(s)* | Last Name* | Suffix* | Academic Degrees | Institution                                                                                   | Location (city, state/province, country) | Role or Contribution, eg, chair, principal investigator | Subgroup, eg, Steering Committee |
|-----------------------------------|------------|---------|------------------|-----------------------------------------------------------------------------------------------|------------------------------------------|---------------------------------------------------------|----------------------------------|
| Colin L.                          | Masters    |         | MD               | Florey Institute of Neuroscience and Mental Health, University of Melbourne                   | Melbourne, VIC, Australia                |                                                         |                                  |
| Paul                              | Maruff     |         | PhD              | Florey Institute of Neuroscience and Mental Health, University of Melbourne                   | Melbourne, VIC, Australia                |                                                         |                                  |
| Jurgen                            | Fripp      |         | PhD              | CSIRO Health and Biosecurity, Australian e-Health Research Centre CSIRO                       | Brisbane, Queensland, Australia          |                                                         |                                  |
| Henry                             | Völzk      |         | PhD              | Institute for Community Medicine, University Medicine Greifswald                              | Greifswald, Germany                      |                                                         |                                  |
| Sterling C.                       | Johnson    |         | PhD              | Wisconsin Alzheimer's Institute, University of Wisconsin School of Medicine and Public Health | Madison, WI, USA                         |                                                         |                                  |
| Marilyn S.                        | Albert     |         | PhD              | Johns Hopkins University                                                                      | Baltimore, MD, USA                       |                                                         |                                  |
| R Nick                            | Bryan      |         | MD, PhD          | Department of Diagnostic Medicine, University of Texas-Austin                                 | Austin, TX, USA                          |                                                         |                                  |
